1  
2  
3  
4  
5  
6  
7  
8  
9  
10  
11  
12  
13  
14  
15  
16  
17  
18  
19  
20  
21  
22  
23  
24  
25  
26  
27  
28  
29  
30  
31

**Selective brain cooling in Arabian oryx (*Oryx leucoryx*):  
a physiological mechanism for coping with aridity?**

Robyn S. Hetem<sup>1\*</sup>, W. Maartin Strauss<sup>2,1,3</sup>, Linda G. Fick<sup>1</sup>, Shane K. Maloney<sup>4,1</sup>,  
Leith C. R Meyer<sup>1</sup>, Andrea Fuller<sup>1</sup>, Mohammed Shobrak<sup>2,5</sup> and Duncan Mitchell<sup>1</sup>

<sup>1</sup> Brain Function Research Group, School of Physiology, University of the Witwatersrand, 7 York Road, Parktown 2193, South Africa

<sup>2</sup> National Wildlife Research Center, Saudi Wildlife Commission, PO Box 1086, Taif, Saudi Arabia

<sup>3</sup> Department of Environmental Sciences, Unisa, Private Bag X6, Florida, 1709, South Africa

<sup>4</sup> School of Anatomy, Physiology, and Human Biology, University of Western Australia, Stirling Highway, Crawley 6009, Western Australia

<sup>5</sup> Biology Department, Science College, Taif University, PO Box 888, Taif, Saudi Arabia.

Running page head: Selective brain cooling in Arabian oryx

**\*Author for correspondence and current address:**

R. S. Hetem

School of Physiology, Medical School

University of the Witwatersrand

7 York Road, Parktown, 2193

Johannesburg, South Africa

Tel: (+2711) 717-2163

Fax: (+2711) 643-2765

E-mail: [robyn.hetem@wits.ac.za](mailto:robyn.hetem@wits.ac.za)

1 Abstract

2 Selective brain cooling is a thermoregulatory effector proposed to conserve body water and, as  
3 such, may help artiodactyls cope with aridity. We measured brain and carotid blood temperature,  
4 using implanted data loggers, in five Arabian oryx (*Oryx leucoryx*) in the desert of Saudi Arabia.  
5 On average, brain temperature was  $0.24 \pm 0.05^{\circ}\text{C}$  lower than carotid blood temperature for four  
6 oryx in April. Selective brain cooling was enhanced in our Arabian oryx compared to another  
7 species from the same genus (gemsbok *Oryx gazella gazella*), exposed to similar ambient  
8 temperatures but less aridity. Arabian oryx displayed a lower threshold ( $37.8 \pm 0.1^{\circ}\text{C}$  vs  $39.8 \pm$   
9  $0.4^{\circ}\text{C}$ ), a higher frequency ( $87 \pm 6\%$  vs  $15 \pm 15\%$ ) and a higher maximum magnitude ( $1.2 \pm$   
10  $0.2^{\circ}\text{C}$  vs  $0.5 \pm 0.3^{\circ}\text{C}$ ) of selective brain cooling than did gemsbok. The dominant male oryx  
11 displayed less selective brain cooling than did any of the other oryx, but selective brain cooling  
12 was enhanced in this oryx as conditions became hotter and drier. Enhanced selective brain  
13 cooling in Arabian oryx supports the hypothesis that selective brain cooling would bestow  
14 survival advantages for artiodactyl species inhabiting hot hyper-arid environments.

15

16 Keywords: brain temperature, artiodactyl, biologging, desert

17

## 1 Introduction

2 Artiodactyla, an evolutionarily successful and hugely speciose order of large ungulates, with 90  
3 extant genera, evolved during the Eocene and speciated during a warming period in the Mid-  
4 Miocene Climatic Optimum (Barnosky et al., 2003). Since they evolved in conditions that were  
5 hotter and drier than present, artiodactyls may be pre-adapted to cope with warmer and drier  
6 environments than those currently experienced (Barnosky et al., 2003; Mitchell and Lust, 2008).  
7 Traditionally, the success of artiodactyls has been attributed to the evolution of improved  
8 locomotion and the ruminant digestive tract, adaptations which allowed these ungulates to use  
9 widely dispersed forage with a high fibre content (Janis, 1989; Codron et al., 2008). Recently,  
10 however, another potential contributor to their success has been proposed: the evolution of the  
11 carotid rete and the use of selective brain cooling (Fuller et al., 2008; Mitchell and Lust, 2008).  
12 The carotid rete consists of an intertwining network of arterioles that lies within a venous sinus at  
13 the base of the brain. Venous blood cooled by evaporation from the nasal mucosa drains into the  
14 sinus and so cools the arterial blood destined for the brain, generating selective brain cooling  
15 (Baker, 1982; Mitchell et al., 1987) - the reduction of brain temperature below arterial blood  
16 temperature (IUPS Thermal Commission, 2003). The rete is absent in the closest relatives to the  
17 artiodactyls, the perissodactyls, absent in the oldest ruminant group, the Tragulidae (Fukuta et al.,  
18 2007), but is present in each of the artiodactyl clades: Ruminantiamorpha, Suinamorpha, and  
19 Camelidamorpha. Recent systematic analysis of the Artiodactyla places the Ruminantiamorpha /  
20 Suinamorpha / Camelidamorpha divergence before the appearance of the Tragulidae within the  
21 Ruminantiamorpha (Spaulding et al., 2009), making it likely that the absence of the rete in  
22 Tragulidae has been a secondary loss. Thus the carotid rete in the Artiodactyla lineage evolved  
23 probably at about the same time as the rumen, during the mid-Miocene, about 20 Mya.

24

25 Selective brain cooling originally was hypothesized to primarily protect the brain during rises in  
26 body temperature (Baker, 1979; Mitchell et al., 1987). However, recent studies support an  
27 alternative concept, namely that mammals possessing a carotid rete may employ selective brain  
28 cooling to attenuate the drive for evaporative cooling in arid conditions. Selective brain cooling  
29 reduces the drive from temperature-sensitive neurones in the hypothalamus on evaporative heat  
30 dissipation and conserves body water by switching body heat loss to non-evaporative avenues  
31 (Jessen et al., 1994; Mitchell et al., 1997; Fuller et al., 1999; Maloney et al., 2002; Mitchell et al.,  
32 2002). Abolition of selective brain cooling, which can occur rapidly, allows evaporative heat loss  
33 to be restored in thermal emergencies, such as flight from a predator (Jessen, 1998; Mitchell et

1 al., 2002). So selective brain cooling would have survival advantages for artiodactyls, not  
2 available to perissodactyls, in environments in which water resources are limited and  
3 unpredictable (Mitchell et al., 2002).

4  
5 If the evolution of the carotid rete indeed promoted thermoregulatory flexibility and thus  
6 facilitated artiodactyl invasion of arid zones during the highly seasonal post-Eocene world  
7 (Mitchell and Lust, 2008), selective brain cooling may be a key adaptation allowing artiodactyls  
8 to cope with the increasing aridity and heat stress that is occurring with climate change (Fuller et  
9 al., 2008). However, not all artiodactyls species exhibit the same capacity for selective brain  
10 cooling. The absence of the rete in primitive artiodactyls, such as the mouse deer (*Tragulus*  
11 *javanicus*, *Tragulus napu*; (Fukuta et al., 2007), might be expected to decrease the water  
12 economy of these species and restrict them to habitats where water scarcity is not an issue.  
13 Indeed, the mouse deer is restricted to climatically-stable forest environments (Whittow et al.,  
14 1977). By contrast, enhanced selective brain cooling may be expected in artiodactyl species  
15 inhabiting hot hyper-arid environments. Arabian oryx (*Oryx leucoryx*) inhabit one of the hottest  
16 deserts in the world, in Saudi Arabia, and survive most of the year, including the hottest summer  
17 months, without access to drinking water. To investigate the status of their selective brain  
18 cooling, we employed implanted data loggers to measure brain and carotid arterial blood  
19 temperatures of five free-living Arabian oryx in their natural habitat. Brain and carotid blood  
20 temperature have not been measured in Arabian oryx previously, but have been measured in  
21 another member of the same genus, the gemsbok (*Oryx gazella gazella*; Maloney et al., 2002).  
22 Gemsbok inhabit hot dry environments in southern Africa, and indeed were studied at ambient  
23 temperatures similar to those experienced by our Arabian oryx, but the rainfall experienced by  
24 our Arabian oryx was one third of that experienced by the gemsbok.

## 25 26 Materials and methods

### 27 *Animals and habitat*

28 The study took place between March and July 2006 within the 2200 km<sup>2</sup> Mahazat as-Sayd  
29 Protected Area (22°25'N, 41°48'E) in the open steppe desert in Saudi Arabia that is both the  
30 historical and the current habitat for Arabian oryx (*Oryx leucoryx*, Pallas 1777). Adult, wild-born  
31 oryx (two male and two female) were captured in the Protected Area in mid-March 2006. The  
32 oryx were habituated in outdoor pens for two weeks to reduce potential peri-operative stress. An

1 additional male oryx was obtained from the breeding herd at the National Wildlife Research  
2 Center in Taif (21°15'N, 40°42'E). This male oryx remained in Taif in a partially shaded pen  
3 throughout the study period and had lucerne and water available *ad libitum*. All experimental  
4 procedures were approved by the Animal Ethics Screening Committee of the University of the  
5 Witwatersrand (protocol no. 2005/87/5).

## 6 7 *Surgery*

8 The oryx, at both locations, were darted and anaesthetized in their holding pens with etorphine  
9 hydrochloride (2.5 mg intramuscularly (IM), M99, C-Vet, Leyland, UK) and, once recumbent,  
10 were transported to a temporary operating theatre within 200 m of the pens. At this theatre, the  
11 animals were placed in sternal recumbency, with their heads elevated. The animals were  
12 intubated and anaesthesia was maintained with 2-6% isoflurane (Aerrane, Astra Zeneca,  
13 Johannesburg, South Africa) administered in 100% oxygen. Respiratory rate, heart rate, arterial  
14 oxygen saturation and rectal temperature were monitored throughout the surgery, which lasted  
15 about two hours.

16  
17 Under sterile surgical conditions, we implanted temperature-sensitive data loggers (see below)  
18 with sensors in the brain and carotid artery. The loggers were dry sterilized in formaldehyde  
19 vapour before implantation. After we had administered a local anaesthetic (3 ml 2% lignocaine  
20 hydrochloride, Bayer Animal Health (Pty) Ltd, Isando, South Africa) subcutaneously (SC) at the  
21 incision sites, the sites were shaved and sterilized with povidone iodine antiseptic (Vetedine,  
22 Vetoquinol, Lure, France). For the measurement of carotid arterial blood temperature, a  
23 thermistor inserted in a blind-ended and thin-walled polytetrafluoroethylene (PTFE) catheter (o.d.  
24 1.35 mm, i.d. 0.97 mm; Straight Aortic Flush 4F Catheter, Cordis, the Netherlands) was  
25 advanced 60 mm into the left common carotid artery towards the heart, at a position midway  
26 along the length of the neck, and secured with a purse-string suture in the arterial wall. Outside  
27 the artery, the PTFE tube was sealed on a Teflon-coated co-axial cable (150 mm long, o.d. 3 mm,  
28 Belden, Richmond, USA) connecting the thermistor to the temperature-sensitive data logger (see  
29 temperature measurements). The data logger was positioned subcutaneously, dorsal to the artery.  
30 For measurement of brain temperature, a second data logger was positioned subcutaneously,  
31 caudal to the base of the left ear. Its Teflon-coated cable was advanced subcutaneously over the  
32 skull, where it was connected to a thermistor housed in a head plate and guide tube. The guide

1 tube, constructed from cellulose acetate butyrate tubing (40 mm long, o.d. 1.95 mm, i.d. 1 mm;  
2 World Precision Instruments, Sarasota, Florida, USA) sealed at the tip by a steel cap, was  
3 inserted through a 2 mm diameter burr hole, which was drilled through the cranium, at co-  
4 ordinates pre-determined from head sections of dead oryx of similar size, so that the probe tip  
5 would be positioned near the hypothalamus. The polyvinyl chloride head plate (20 × 10 × 5 mm)  
6 was secured to the skull by two bone screws and covered by skin.

7  
8 The wounds were treated with a topical antiseptic spray (Necrospray, Centaur Labs,  
9 Johannesburg, South Africa). Each oryx received a long-acting antibiotic (450 mg IM, penicillin,  
10 Norocillin La, Norbrook Laboratories Ltd., Newry, Northern Ireland), a non-steroidal anti-  
11 inflammatory analgesic (100 mg IM, phenylbutazone, Dexaphenylarthritis injectable solution,  
12 Vetoquinol Veterinary Pharmaceuticals, Cedex, France), a long-acting parasiticide (2 ml SC,  
13 Ivermectin, Noromectin, Norbrook Laboratories Ltd., Newry, Northern Ireland) and a  
14 multivitamin injection (9 ml I.M., Multivit injectable solution, Univet Ltd., Ireland). Before  
15 anaesthesia was terminated, we fitted a neck collar containing a tracking radio transmitter (MOD-  
16 500 Telonics, Inc. Mesa, AZ, USA).

17  
18 Following surgery, the oryx were transported back to their pens, where they became ambulatory  
19 within ~10 minutes after the effects of etorphine were reversed with diprenorphine hydrochloride  
20 (7.5 mg intravenously (IV), M5050, C-Vet, Leyland, UK). The oryx at Taif remained in its pen  
21 for the duration of the study. Two weeks after surgery, the four oryx in the Mahazat as-Sayd  
22 Protected Area were released into a 2 km<sup>2</sup> fenced enclosure with natural forage and water  
23 available *ad libitum*. Ten days later they were allowed to enter and range freely within the  
24 Mahazat as-Sayd Protected Area, where they were left undisturbed, apart from the occasional  
25 serendipitous visual contact by rangers. The four oryx separated from each other shortly after  
26 their release, with some joining other oryx in the reserve.

27  
28 A year after surgery, the four oryx were radio tracked, captured and transported back to the  
29 holding pens. Those oryx, and the one at Taif, were anaesthetized again and the data loggers were  
30 removed under a surgical procedure similar to that used for the original implantation. The  
31 surgical wounds had healed and there were no signs of infection. After two weeks of recovery in  
32 pens, the four free-living oryx were re-released into the Mahazat as-Sayd Protected Area.

33

1 *Temperature measurements*

2 The miniature thermometric data loggers (StowAway XTI, Onset Computer, Pocasset,  
3 Massachusetts, USA) had outside dimensions of  $\sim 50 \times 45 \times 20$  mm and a mass of  $\sim 40$  g when  
4 covered in inert wax (Sasol, Johannesburg, South Africa). Temperature sensors used to measure  
5 brain and carotid blood temperatures were constructed from ruggedized glass-coated bead  
6 thermistors with insulated extension leads (bead diameter 0.3 mm; AB0E3-BR11KA103N,  
7 Thermometrics, Edison, New Jersey, USA). The loggers had a resolution of  $0.04^{\circ}\text{C}$  and a  
8 measurement range from  $+ 34^{\circ}\text{C}$  to  $+ 46^{\circ}\text{C}$ . The scan interval of the loggers was set at 5 minutes.  
9 Each sensor assembly was calibrated against a high-accuracy thermometer (Quat 100, Heraeus,  
10 Hanau, Germany) in an insulated water bath. After calibration, the loggers and their sensors  
11 measured blood and brain temperatures to an accuracy better than  $0.05^{\circ}\text{C}$ .

12  
13 *Climatic data measurements*

14 We collected climatic data from a portable weather station erected near the Mahazat as-Sayd  
15 Protected Area, at the Saja/Umm ar-Rimth Protected Area ( $23^{\circ}22'\text{N}$ ,  $42^{\circ}45'\text{E}$ ), and also at the  
16 National Wildlife Research Center in Taif. We recorded wind speed ( $\text{m}\cdot\text{s}^{-1}$ ), solar radiation  
17 ( $\text{W}\cdot\text{m}^{-2}$ ), dry-bulb temperature ( $^{\circ}\text{C}$ ) and relative humidity (%). We also recorded black globe  
18 temperature ( $^{\circ}\text{C}$ ) and rainfall on site at the Mahazat as-Sayd Protected Area for the duration of  
19 the study period. Black globe temperature provides an index of the thermal load on an animal as  
20 it integrates the effects of radiant and convective heat exchange.

21  
22 *Data analysis*

23 Although we recovered the data a year after surgery, we analysed responses for a period when we  
24 had the most complete data set. The data loggers that measured carotid blood temperature in three  
25 of the oryx (identified as Oryx 1, Oryx 2, and Oryx 3) malfunctioned within a month after  
26 surgery (after a minimum of 4400 simultaneous measurements of brain and carotid blood  
27 temperature). The data logger that measured brain temperature in the captive male oryx in Taif  
28 (identified as Taif oryx) malfunctioned within a month after surgery (after  $\sim 7900$  simultaneous  
29 measurements of brain and carotid blood temperatures). We obtained brain temperature and  
30 carotid blood temperature data from the other free-living male oryx (identified as Oryx 4) for  
31 four months after surgery ( $\sim 16500$  simultaneous measurements of brain and carotid blood

1 temperatures), but his brain temperature probe exhibited an intermittent fault that restricted data  
2 analysis to two months. Despite the fault, the data from this animal allowed us to compare  
3 selective brain cooling over two seasonal periods. Furthermore, the opportunity presented itself to  
4 compare a dominant male with a subordinate male exposed to similar environmental conditions.

5  
6 We compared variables of the nycthemeral rhythm of brain and carotid blood temperatures with  
7 paired t-tests. We analyzed the relationship between brain temperature and carotid blood  
8 temperature by sorting all 5-minute measurements of carotid blood temperature into 0.1°C  
9 classes, and determining the mean, standard deviation, maximum and minimum brain  
10 temperature at each class of carotid blood temperature. We determined the threshold for selective  
11 brain cooling as the point at which the regression line of brain temperature against carotid blood  
12 temperature intercepted the line of identity ( $y = x$ ). Selective brain cooling was calculated as the  
13 difference between carotid blood and brain temperature, with positive values indicating selective  
14 brain cooling. The maximum positive difference was defined as maximum selective brain cooling  
15 capacity. Mean selective brain cooling was calculated as the average positive difference and the  
16 frequency of selective brain cooling was calculated as the proportion of positive values.

17  
18 We used mixed effects linear models (function ‘lme’ using the statistical package ‘R’, R  
19 Development Core Team 2008) to investigate the effect of air temperature, water vapour  
20 pressure, water availability and carotid blood temperature on the average 24-hour selective brain  
21 cooling (difference between carotid blood and brain temperatures). Water availability was a  
22 categorical predictor and divided our data into four periods: water was freely available and the  
23 oryx drank daily, water was freely available and the oryx drank weekly, limited free-standing  
24 water (7 mm rain in May) and no free-standing water (0 mm rain in June). We controlled for  
25 repeated measurements by including “individual” and “Julian day” as random factors. To account  
26 for potential autocorrelation between our variables, we included a first-order autoregressive  
27 process (AR1) in our model structure. We generated 16 models (1 full model, 1 null model and  
28 14 reduced models) based on all additive terms combinations and determined the best-fit model  
29 based on the Akaike’s Information Criterion (AIC). Models presenting with  $\Delta_{AIC}$  greater than two  
30 were not considered plausible models (Burnham and Anderson, 2002).

31  
32 Values are expressed as mean  $\pm$  s.d. and  $P < 0.05$  was considered significant.



1

## 2 Results

### 3 *Climate*

4 Air and black globe temperatures varied as a function of the time of day, peaking just after solar  
5 noon (12:00) and reaching a minimum just before sunrise (Fig. 1). Air and black globe  
6 temperatures increased progressively from April (when all rain fell) to June (when no rain fell,  
7 Table 1). Despite a difference in the number of days over which selective brain cooling was  
8 recorded for each oryx in April, there was no difference in the 24-hour air temperatures  
9 experienced by the four oryx ( $F_{3,84} = 2.0$ ,  $P = 0.12$ ). Solar radiation showed the expected bell-  
10 shaped distribution and peaked at  $1034 \pm 64 \text{ W.m}^{-2}$  around solar noon in the month in which we  
11 had the most complete selective brain cooling data set (April). Wind speed increased to a  
12 maximum of  $9.4 \pm 2.1 \text{ m.s}^{-1}$  in the late afternoon and averaged  $4.6 \pm 1.5 \text{ m.s}^{-1}$  over the 24-hour  
13 periods during April. Mean 24-hour vapour pressure and relative humidity decreased  
14 progressively from April to June (Table 1). Rainfall totalled 31 mm during 2006, substantially  
15 lower than the ten-year average of  $100 \pm 60 \text{ mm}$ . April was the wettest month (17 mm) but some  
16 rain fell during March (7 mm) and May (7 mm). Because surgery was completed in late March,  
17 we have excluded data for March from our analysis to eliminate any possible post-surgical  
18 abnormalities in responses.

19

### 20 *Selective brain cooling*

21 Brain and carotid blood temperatures exhibited a nycthemeral rhythm with a trough between  
22 6:00 and 7:00 (following sunrise) and a peak between 17:00 and 18:00 (shortly before sunset,  
23 Fig. 2). During April, in four animals (i.e. excluding Oryx 4), the mean 24-hour brain  
24 temperature was lower than carotid blood temperature ( $38.45 \pm 0.06^\circ\text{C}$  vs  $38.70 \pm 0.10^\circ\text{C}$ ;  $t_3 =$   
25  $11.5$ ,  $P = 0.0014$ ). Minimum 24-hour brain and carotid blood temperatures were similar ( $37.36 \pm$   
26  $0.28^\circ\text{C}$  vs  $37.53 \pm 0.34^\circ\text{C}$ ;  $t_3 = 0.99$ ,  $P = 0.39$ ), while the maximum 24-hour brain temperature  
27 was significantly lower than carotid blood temperature ( $39.34 \pm 0.28^\circ\text{C}$  vs  $39.61 \pm 0.20^\circ\text{C}$ ;  $t_3 =$   
28  $4.2$ ,  $P = 0.024$ ). On average, the oryx implemented selective brain cooling throughout the day,  
29 except for the period after sunrise (Fig. 2). For the four oryx, brain temperature was lower than  
30 carotid blood temperature, measured simultaneously,  $87 \pm 6\%$  of the time. On average, brain  
31 temperature was  $0.24 \pm 0.05^\circ\text{C}$  lower than carotid blood temperature for these four oryx in April.

1 Mean selective brain cooling, the average difference between carotid blood and brain temperature  
2 when the oryx were implementing selective brain cooling, was  $0.32 \pm 0.03^{\circ}\text{C}$  and the maximum  
3 magnitude of selective brain cooling was  $1.15 \pm 0.17^{\circ}\text{C}$ . The threshold for selective brain  
4 cooling, defined as the point at which carotid blood and mean brain temperatures were equal, was  
5  $37.8 \pm 0.1^{\circ}\text{C}$  (mean  $\pm$  s.d.,  $n = 4$ , Table 2).

6

7 Figure 3 (upper panels) shows brain temperature as a function of carotid blood temperature and  
8 the frequency distribution of carotid blood temperature in two male oryx while both had access to  
9 food and water; the male in Taif drank water daily (Fig. 3 upper right panel) whereas the male  
10 (Oryx 3) in the Mahazat as-Sayd Protected Area drank less frequently (Fig. 3 upper left panel).  
11 The captive male oryx (Taif oryx) employed selective brain cooling less frequently (81% vs  
12 94%) than did the free-living male oryx (Oryx 3), despite the two oryx having the same carotid  
13 blood temperature and threshold of selective brain cooling (Table 2).

14

15 Oryx 4, a male that frequently was observed pacing the fence while in captivity, initiating fights  
16 with other males and squat-defecating, behaviours typical of a dominant male (Stanley Price,  
17 1989), displayed less selective brain cooling than did any of the other oryx (Table 2). Compared  
18 to Oryx 3, a male that appeared to us to be a subordinate, the dominant male (Oryx 4) showed a  
19 higher threshold of selective brain cooling ( $39.6^{\circ}\text{C}$  vs  $37.8^{\circ}\text{C}$ ), a lower maximum magnitude of  
20 selective brain cooling ( $0.93^{\circ}\text{C}$  vs  $1.35^{\circ}\text{C}$ ) and implemented selective brain cooling less  
21 frequently (11% vs 94%, Table 2). Unlike that of the other oryx (Fig. 2), the brain temperature of  
22 the dominant male oryx (Oryx 4) generally was above that of his carotid blood temperature,  
23 particularly at low body temperatures in May (Fig. 4 upper panel), when climatic conditions were  
24 relatively mild and drinking water was available through ephemeral pools of rainwater. But  
25 selective brain cooling was enhanced in Oryx 4 when conditions were hotter and drier in June  
26 (Fig. 4 lower panel). Although Oryx 4 spent only 11% of the time with his hypothalamus cooler  
27 than carotid blood during May (Fig. 3 lower left panel), this frequency increased to 38% of the  
28 time in June (Fig. 3 lower right panel). His brain temperature was an average  $0.28 \pm 0.25^{\circ}\text{C}$   
29 higher than carotid blood temperature during May, and only  $0.03 \pm 0.32^{\circ}\text{C}$  higher during June.

30

31 These differences in selective brain cooling between May and June were not simply the result of  
32 a higher carotid blood temperature during June. When analysed over the same carotid blood

1 temperature range (37-40°C), both the frequency of selective brain cooling (30%) and the average  
2 difference between carotid blood and brain temperatures ( $0.06 \pm 0.30^\circ\text{C}$ ) indicated enhanced  
3 selective brain cooling during the dry June period compared to May. The threshold for selective  
4 brain cooling in Oryx 4 decreased with increasing ambient temperature and aridity, from  $39.6^\circ\text{C}$   
5 in May to  $39.0^\circ\text{C}$  in June. Above the threshold, the difference between carotid blood and brain  
6 temperatures was higher in June ( $0.28 \pm 0.24^\circ\text{C}$ ) than during May ( $0.16 \pm 0.20^\circ\text{C}$ ). Nevertheless,  
7 the maximum magnitude of selective brain cooling was similar in May ( $0.93^\circ\text{C}$ ) and June  
8 ( $1.03^\circ\text{C}$ ), and selective brain cooling seldom exceeded  $1^\circ\text{C}$  at any time.

9

10 The mixed effects linear models allowed us to differentiate the effects of air temperature and  
11 aridity and confirmed that water availability (drinking frequency) was the best predictor for mean  
12 24-hour selective brain cooling, with the top five models all incorporating water availability  
13 (Table 3). The best model incorporated the effects of water availability, carotid temperature and  
14 water vapour pressure. Among tested explanatory variables, air temperature had no measurable  
15 effect on mean 24-hour selective brain cooling; the addition of air temperature to the model  
16 changed the AIC value by more than two (Burnham and Anderson, 2002).

17

## 18 Discussion

19 Our study provides the first remote and continuous measurement of brain and carotid blood  
20 temperatures of Arabian oryx (*Oryx leucoryx*) in their natural habitat, the deserts of Saudi Arabia.  
21 Brain temperature generally was below carotid blood temperature near the peak of the  
22 endogenous nychthemeral rhythm of body temperature. However, selective brain cooling was not  
23 obligatory at high body temperatures; on occasion, brain temperature reached  $41.2^\circ\text{C}$  when the  
24 corresponding carotid blood temperature was also  $41.2^\circ\text{C}$ . Despite the amplitude of the  
25 nychthemeral rhythm of brain and carotid blood temperature of our oryx being similar to that  
26 measured in other species ( $\sim 2^\circ\text{C}$ ), selective brain cooling appeared to be enhanced in our  
27 Arabian oryx. The degree of selective brain cooling can be measured in three ways, namely, the  
28 magnitude of the difference between carotid blood and brain temperature, the threshold at which  
29 selective brain cooling is implemented, and the proportion of time spent using selective brain  
30 cooling. Our Arabian oryx, which were exposed to drier natural conditions than any previous  
31 animals in which selective brain cooling has been measured, displayed a high maximum

1 magnitude of selective brain cooling (1.15°C), a low threshold for selective brain cooling  
2 (37.8°C) and a high frequency of selective brain cooling (87%).

3  
4 The view that selective brain cooling would be enhanced under dry conditions is supported by  
5 our finding that selective brain cooling was observed more frequently in the free-living male oryx  
6 (Oryx 3), which drank infrequently, than did the captive male oryx (Taif oryx), which drank  
7 daily, despite the two oryx being exposed to similar ambient temperatures and having the same  
8 carotid blood temperature. Furthermore, under hot and dry conditions (in June), male Oryx 4  
9 decreased the threshold at which selective brain cooling was implemented compared to that in  
10 May, thereby increasing the range of body temperatures over which selective brain cooling was  
11 implemented and thus increasing the frequency of selective brain cooling (Fig. 3 lower right  
12 panel). The enhanced selective brain cooling was driven primarily by water availability (drinking  
13 frequency), but carotid blood temperature and water vapour pressure also influenced 24-hour  
14 selective brain cooling (Table 3).

15  
16 Our conclusions about the enhancement of selective brain cooling by aridity seem robust, but our  
17 conclusions about seasonal differences in selective brain cooling in the arid-adapted oryx are  
18 tentative, because we obtained data from only a single male oryx (Oryx 4) under hot and dry  
19 conditions (June). Since non-thermal factors affecting sympathetic tone may override the thermal  
20 regulation of brain temperature (Kuhnen and Jessen, 1994; Maloney et al., 2001), particularly in  
21 free-living animals (Jessen et al., 1994; Maloney et al., 2002; Caputa, 2004), high vigilance, and  
22 consequent high sympathetic tone, may have acted to decrease the degree of selective brain  
23 cooling in the dominant male oryx. His frequency of selective brain cooling was lower, and his  
24 threshold of selective brain cooling was higher, than that of all the other oryx measured (Fig. 3  
25 upper panels; Table 2). It remains to be seen whether subordinate oryx have the capacity to  
26 further increase the frequency of selective brain cooling above 87% or whether they are capable  
27 of increasing the magnitude of selective brain cooling as conditions get hotter and drier  
28 seasonally. Other species capable of selective brain cooling increase the magnitude of selective  
29 brain cooling during conditions of water deprivation and heat stress, as shown in both laboratory-  
30 housed sheep (Fuller et al., 2007) and Bedouin goats (Jessen et al., 1997; Jessen et al., 1998).  
31 Compared to euhydration, dehydrated goats and sheep increased selective brain cooling with no  
32 alteration in the threshold body temperature at which selective brain cooling was implemented.  
33 When animals were not heat stressed and were able to lose heat through non-evaporative

1 avenues, two restrained camels at rest showed no obvious difference in brain and blood  
2 temperatures between hydrated and dehydrated states (Schroter et al., 1989).

3  
4 We conclude that the Arabian oryx used selective brain cooling to facilitate homeostasis in hot  
5 and dry environments. Arid-zone mammals possessing a carotid rete may employ selective brain  
6 cooling to attenuate thermal drive by reducing brain temperature, which reduces evaporative heat  
7 loss and ultimately conserves water by transferring cooling to non-evaporative means (Kuhnen,  
8 1997; Jessen, 1998; Jessen, 2001; Mitchell et al., 2002). Our oryx, like free-living eland  
9 (*Tragelaphus oryx*; Fuller et al., 1999), gemsbok (Maloney et al., 2002), black wildebeest  
10 (*Connochaetes gnou*; Jessen et al., 1994), kudu (*Tragelaphus strepsiceros*; Hetem et al., 2008)  
11 and springbok (*Antidorcas marsupialis*; Mitchell et al., 1997), displayed the greatest magnitude  
12 of selective brain cooling when at rest, while body temperature was rising, in the late afternoon  
13 (Fig. 2). Selective brain cooling appeared to be enhanced in our Arabian oryx compared to that  
14 exhibited by gemsbok, another species from the same genus (Maloney et al., 2002), exposed to  
15 similar ambient temperatures but less aridity (rainfall was three times higher than that  
16 experienced by our oryx). Our oryx displayed a lower threshold of selective brain cooling ( $37.8 \pm$   
17  $0.1^\circ\text{C}$  vs  $39.8 \pm 0.4^\circ\text{C}$ ), a higher frequency of selective brain cooling ( $87 \pm 6\%$  vs  $15 \pm 15\%$ ) and  
18 a higher magnitude of maximum selective brain cooling ( $1.2 \pm 0.2^\circ\text{C}$  vs  $0.5 \pm 0.3^\circ\text{C}$ ) than did the  
19 gemsbok. Indeed, the threshold for selective brain cooling in Arabian oryx was lower than that  
20 observed in any of the African antelope species mentioned above (Jessen et al., 1994; Mitchell et  
21 al., 1997; Fuller et al., 1999; Hetem et al., 2008), implying that they spent a higher proportion of  
22 time selectively cooling the brain. Whether the apparent enhanced capacity for selective brain  
23 cooling in the Arabian oryx reflects differences in the physiology or the anatomy of the carotid  
24 rete heat exchanger, remains to be elucidated. Even though the magnitude of selective brain  
25 cooling in our oryx was much less than the  $2.7^\circ\text{C}$  originally reported for the exercising captive  
26 Thomson's gazelle (Taylor and Lyman, 1972), it was double the magnitude that substantially  
27 reduced both the respiratory water loss (Kuhnen, 1997) and the metabolic cost of  
28 thermoregulation (Kuhnen and Jessen, 1991) in goats.

### 30 Conclusion

31 We have shown that Arabian oryx use enhanced selective brain cooling in the extremely hot and  
32 hyper-arid conditions of the Arabian desert. The enhancement took the form of increased  
33 frequency of, and lower threshold for, selective brain cooling; the magnitude of selective brain

1 cooling in the arid-adapted Arabian oryx was similar to that observed in other free-living  
2 artiodactyls (Jessen et al., 1994; Jessen and Kuhnen, 1996; Mitchell et al., 1997; Fuller et al.,  
3 1999; Maloney et al., 2002), implying that there may be a physiological limit of about 1°C to  
4 selective brain cooling in free-living artiodactyls. Because the hypothalamus is sensitive to  
5 changes in temperature of a few tenths of a degree (Kuhnen, 1997), such selective brain cooling  
6 would be sufficient to suppress evaporative cooling and therefore reduce water loss. Since  
7 selective brain cooling does not disrupt other homeostatic systems, it may provide an economical  
8 form of autonomic thermoregulation. The carotid rete may ultimately provide artiodactyls with  
9 greater acclimatization potential to the hot and dry conditions predicted to occur in the future.

### 11 Acknowledgements

12 We thank the Saudi Wildlife Commission, Riyadh, Saudi Arabia, in particular the director His  
13 Royal Highness Prince Saud Al Faisal, the current secretary-general, HH prince Bander Bin  
14 Saud, and the secretary-general at the time the study was conducted, Professor AH Abuzinada,  
15 for supporting the research. From the National Wildlife Research Center (NWRC), we are  
16 grateful to Dr Saud Anagariyah for his support in capturing the oryx and the current director,  
17 Ahmad Al Bouq. In addition, we thank the Mahazat as-Sayd Protected Area rangers for  
18 monitoring the animals and the mammal keepers at NWRC for their help with animal handling  
19 and assistance during surgery. We thank Dr Jodie Martin and Dr Benjamin Rey for assistance  
20 with the mixed effects linear models.

### 22 Funding

23 This research was funded by the National Research Foundation, South Africa, the University of  
24 the Witwatersrand Medical Faculty Research Endowment Fund and START/PACOM African  
25 PhD fellowship awarded to RS Hetem.

1 References

- 2 **Baker, M. A.** (1979). A brain-cooling system in mammals. *Sci. Am.* **240**, 114-123.
- 3 **Baker, M. A.** (1982). Brain cooling in endotherms in heat and exercise. *Annu. Rev. Physiol.* **44**,  
4 85-96.
- 5 **Barnosky, A. D., Hadly, E. A. and Bell, C. J.** (2003). Mammalian response to global warming  
6 on varied temporal scales. *J. Mammal.* **84**, 354-368.
- 7 **Burnham, K. P. and Anderson, D. R.** (2002). Model selection and multimodel inference. A  
8 practical information-theoretic approach. New York: Springer-Verlag New York, Inc.
- 9 **Caputa, M.** (2004). Selective brain cooling: a multiple regulatory mechanism. *J. Therm. Biol.*  
10 **29**, 691-702.
- 11 **Codron, D., Brink, J. S., Rossouw, L. and Clauss, M.** (2008). The evolution of ecological  
12 specialization in southern African ungulates: competition- or physical environmental turnover?  
13 *Oikos* **117**, 344-353.
- 14 **Fukuta, K., Kudo, H., Sasaki, M., Kimura, J., Ismail, D. B. and Endo, H.** (2007). Absence of  
15 carotid rete mirabile in small tropical ruminants: implications for the evolution of the arterial  
16 system in artiodactyls. *J. Anat.* **210**, 112-116.
- 17 **Fuller, A., Meyer, L. C. R., Mitchell, D. and Maloney, S. K.** (2007). Dehydration increases the  
18 magnitude of selective brain cooling independently of core temperature in sheep. *Am. J. Physiol.*  
19 – *Regul. Integr. Comp. Physiol.* **293**, 438-446.
- 20 **Fuller, A., Hetem, R. S., Meyer, L. C. R., Mitchell, D. and Maloney, S. K.** (Year). Selective  
21 brain cooling: a physiological mechanism for coping with aridity? In *Molecules to migration:*  
22 *The pressures of life*, 4th CPB Meeting in Africa (eds. S. Morris and A. Vosloo), pp. 375-382.  
23 Medimond Publishing S.r.l., Via Maserati 5, 40128 Bologna, Italy.
- 24 **Fuller, A., Moss, D. G., Skinner, J. D., Jessen, P. T., Mitchell, G. and Mitchell, D.** (1999).  
25 Brain, abdominal and arterial blood temperatures of free-ranging eland in their natural habitat.  
26 *Pflügers Arch./Eur. J. Physiol.* **438**, 671-680.
- 27 **Hetem, R. S., Mitchell, D., Maloney, S. K., Meyer, L. C. R., Fick, L. G., Kerley, G. I. H. and**  
28 **Fuller, A.** (2008). Fever and sickness behavior during an opportunistic infection in a free-living  
29 antelope, the greater kudu (*Tragelaphus strepsiceros*). *Am. J. Physiol. – Regul. Integr. Comp.*  
30 *Physiol.* **294**, R246-R254.
- 31 **IUPS Thermal Commission.** (2003). Glossary of terms for thermal physiology. *J. Therm. Biol.*  
32 **28**, 75-106.

- 1 **Janis, C. M.** (1989). A climatic explanation for patterns of evolutionary diversity in ungulate  
2 mammals. *Palaeontology* **32**, 463-481.
- 3 **Jessen, C.** (1998). Brain cooling: an economy mode of temperature regulation in artiodactyls.  
4 *News Physiol. Sci.* **13**, 281-286.
- 5 **Jessen, C.** (2001). Selective brain cooling in mammals and birds. *Jpn. J. Physiol.* **51**, 291-301.
- 6 **Jessen, C. and Kuhnen, G.** (1996). Seasonal variations of body temperature in goats living in an  
7 outdoor environment. *J. Therm. Biol.* **21**, 197-204.
- 8 **Jessen, C., Dmi'el, R., Choshniak, I., Ezra, D. and Kuhnen, G.** (Year). Effects of dehydration  
9 and rehydration on selective brain cooling in the black Bedouin goat. In Proceedings of the  
10 International Symposium on Thermal Physiology (eds. B. N. Johannsen and R. Nielsen), pp. 107-  
11 110.
- 12 **Jessen, C., Dmi'el, R., Choshniak, I., Ezra, D. and Kuhnen, G.** (1998). Effects of dehydration  
13 and rehydration on body temperatures in the black Bedouin goat. *Pflügers Arch./Eur. J. Physiol.*  
14 **436**, 659-666.
- 15 **Jessen, C., Laburn, H. P., Knight, M. H., Kuhnen, G., Goelst, K. and Mitchell, D.** (1994).  
16 Blood and brain temperatures of free-ranging black wildebeest in their natural environment. *Am.*  
17 *J. Physiol. – Regul. Integr. Comp. Physiol.* **267**, R1528-R1536.
- 18 **Kuhnen, G.** (1997). Selective brain cooling reduces respiratory water loss during heat stress.  
19 *Comp. Biochem. Physiol. A* **118**, 891-895.
- 20 **Kuhnen, G. and Jessen, C.** (1991). Threshold and slope of selective brain cooling. *Pflügers*  
21 *Arch./Eur. J. Physiol.* **418**, 176-183.
- 22 **Kuhnen, G. and Jessen, C.** (1994). Thermal signals in control of selective brain cooling. *Am. J.*  
23 *Physiol.* **267**, R355-R359.
- 24 **Maloney, S., Fuller, A., Mitchell, G. and Mitchell, D.** (2002). Brain and arterial blood  
25 temperatures of free-ranging oryx (*Oryx gazella*). *Pflügers Arch./Eur. J. Physiol.* **443**, 437-445.
- 26 **Maloney, S. K., Fuller, A., Mitchell, G. and Mitchell, D.** (2001). Rectal temperature  
27 measurement results in artifactual evidence of selective brain cooling. *Am. J. Physiol. – Regul.*  
28 *Integr. Comp. Physiol.* **281**, R108-R114.
- 29 **Mitchell, D., Laburn, H. P., Nijland, M. J. M. and Zurovsky, Y.** (1987). Selective brain  
30 cooling and survival. *S. Afr. J. Sci.* **83**, 598-604.
- 31 **Mitchell, D., Maloney, S. K., Laburn, H. P., Knight, M. H., Kuhnen, G. and Jessen, C.**  
32 (1997). Activity, blood temperature and brain temperature of free-ranging springbok. *J. Comp.*  
33 *Physiol. B* **167**, 335-343.



- 1 **Mitchell, D., Maloney, S. K., Jessen, C., Laburn, H. P., Kamerman, P. R., Mitchell, G. and**  
2 **Fuller, A.** (2002). Adaptive heterothermy and selective brain cooling in arid-zone mammals.  
3 *Comp. Biochem. Physiol. B* **131**, 571-585.
- 4 **Mitchell, G. and Lust, A.** (2008). The carotid rete and artiodactyl success. *Biol. Lett.* **4**, 415-418.
- 5 **Schroter, R. C., Robertshaw, D. and Zine Filali, R.** (1989). Brain cooling and respiratory heat  
6 exchange in camels during rest and exercise. *Resp. Physiol.* **78**, 95-105.
- 7 **Spaulding, M., O'Leary, M. A. and Gatesy, J.** (2009). Relationships of Cetacea (Artiodactyla)  
8 among mammals: Increased taxon sampling alters interpretations of key fossils and character  
9 evolution. *PLoS ONE* **4(9)**, e7062.
- 10 **Stanley Price, M. R.** (1989). Animal reintroductions: the Arabian oryx in Oman. Cambridge:  
11 Cambridge University Press.
- 12 **Taylor, C. R. and Lyman, C. P.** (1972). Heat storage in running antelopes: independence of  
13 brain and body temperatures. *Am. J. Physiol.* **222**, 114-117.
- 14 **Whittow, G. C., Scammell, C. A., Leong, M. and Rand, D.** (1977). Temperature regulation in  
15 the smallest ungulate, the lesser mouse deer (*Tragulus javanicus*). *Comp. Bioch. Physiol. A* **56**,  
16 23-26.
- 17  
18

1 Figure captions

2 Figure 1. Average 24-hour pattern of air temperature (mean  $\pm$  s.d.) during May (light grey line)  
3 and June (black line). The shaded grey area represents the range of air temperature to which each  
4 of the four oryx were exposed for the period during which we collected selective brain cooling  
5 data in April.

6  
7 Figure 2. Average 24-hour rhythm of brain (grey line) and carotid blood (black line) temperatures  
8 for two female (top panels) and two male (bottom panels) oryx over 15 and 27 days in April. All  
9 oryx had *ad libitum* access to food and water. Horizontal bars indicate night-time.

10  
11 Figure 3. Brain temperature as a function of carotid blood temperature (top panels) and the  
12 frequency distribution of carotid blood temperature (bottom panels), in two male oryx (Oryx 3  
13 and the Taif oryx), when both animals had *ad libitum* access to food and water, and a free-living  
14 male oryx (Oryx 4), while free ranging in the desert in May and in June. Each 5-minute recording  
15 of carotid blood temperature was sorted into 0.1°C classes and the mean (solid black line),  
16 minimum (lower grey line) and maximum (upper grey line) brain temperatures were calculated  
17 for each 0.1°C class of carotid blood temperature. The dashed line represents the line of identity;  
18 points below this line reflect selective brain cooling. Lower panels in each set show the absolute  
19 frequencies with which each 0.1°C class of blood temperature occurred; 6491 data points were  
20 obtained for the free-living male oryx (Oryx 3), 7968 data points for the captive male oryx in Taif  
21 (Taif oryx), 8067 data points for the free-living male oryx (Oryx 4) in May and 8355 data points  
22 in June.

23  
24 Figure 4. Brain (grey line) and carotid blood (black line) temperatures of the dominant free-living  
25 male oryx (Oryx 4) over four-day periods when mean ambient temperature was  $27.9 \pm 2.0^\circ\text{C}$   
26 (May) and  $34.7 \pm 0.5^\circ\text{C}$  (June). No rain fell in June.

27

1 Figure 1.

2

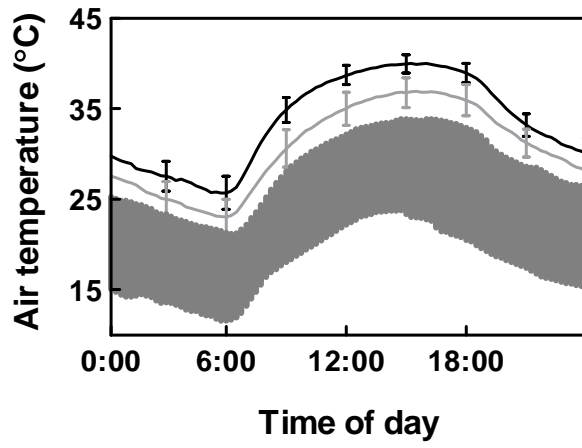

1 Figure 2.

2

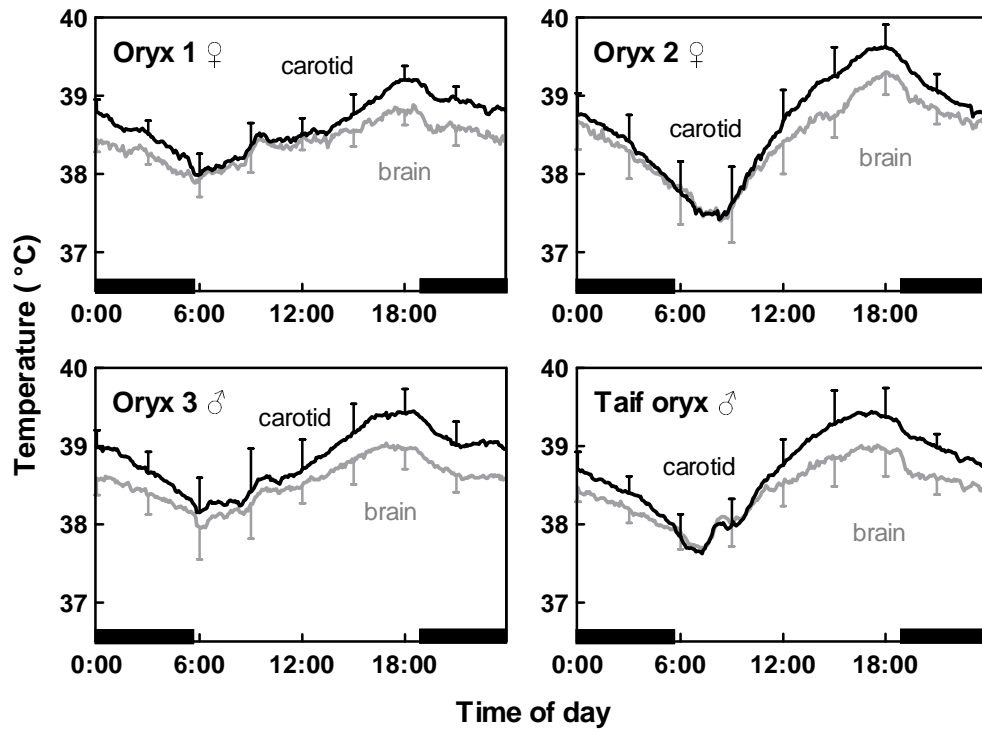

1 Figure 3.

2

3

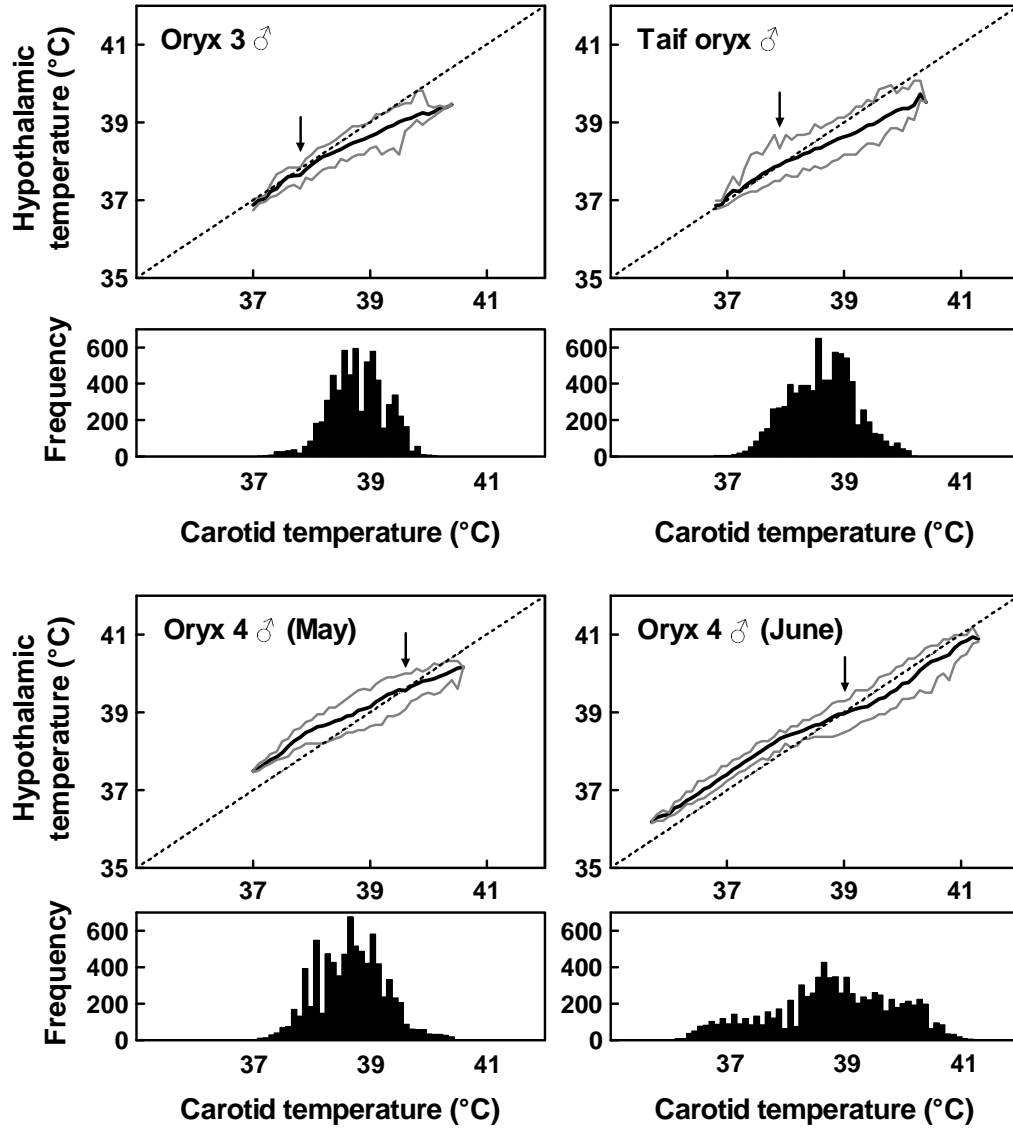

1 Figure 4.

2

3

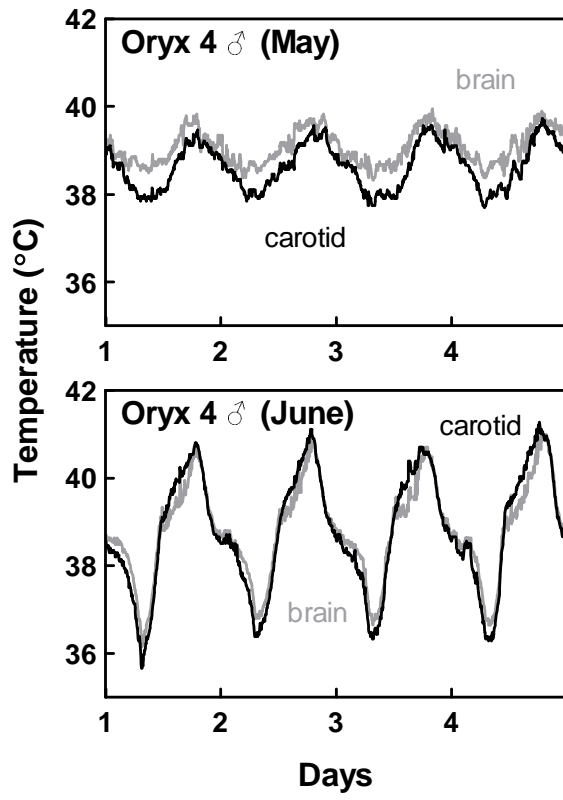

1 Table 1: Environmental conditions (mean  $\pm$  s.d.) during the three months in which the oryx were  
 2 living free in the Mahazat as-Sayd Protected Area

|                                              | April           | May             | June            |
|----------------------------------------------|-----------------|-----------------|-----------------|
| Air temperature ( $^{\circ}$ C)              |                 |                 |                 |
| 24-hour mean                                 | 25.0 $\pm$ 3.6  | 30.5 $\pm$ 1.7  | 33.7 $\pm$ 0.9  |
| 24-hour minimum                              | 17.2 $\pm$ 4.1  | 22.7 $\pm$ 1.9  | 25.3 $\pm$ 1.7  |
| 24-hour maximum                              | 31.4 $\pm$ 3.5  | 36.9 $\pm$ 1.9  | 40.2 $\pm$ 1.0  |
| Black globe temperature ( $^{\circ}$ C)      |                 |                 |                 |
| 24-hour mean                                 | 31.7 $\pm$ 3.0  | 35.4 $\pm$ 2.9  | 38.1 $\pm$ 1.4  |
| 24-hour minimum                              | 16.4 $\pm$ 3.2  | 20.0 $\pm$ 2.3  | 21.5 $\pm$ 2.8  |
| 24-hour maximum                              | 51.0 $\pm$ 5.6  | 55.0 $\pm$ 4.3  | 57.9 $\pm$ 3.3  |
| Mean 24-hour vapour pressure (kPa)           | 0.81 $\pm$ 0.26 | 0.79 $\pm$ 0.28 | 0.44 $\pm$ 0.05 |
| Relative humidity (%)                        | 25 $\pm$ 10     | 20 $\pm$ 9      | 9 $\pm$ 1       |
| Mean 24-hour wind speed (m.s <sup>-1</sup> ) | 4.6 $\pm$ 1.5   | 4.2 $\pm$ 1.3   | 4.1 $\pm$ 1.0   |
| Mean 24-hour radiation (W.m <sup>-2</sup> )  | 286 $\pm$ 50    | 289 $\pm$ 46    | 312 $\pm$ 12    |
| Total rainfall (mm)                          | 17              | 7               | 0               |

3

1 Table 2. Average brain and carotid blood temperatures recorded every 5 minutes and the average difference between carotid blood ( $T_{\text{carotid}}$ )  
 2 and brain ( $T_{\text{brain}}$ ) temperatures, as well as the mean, maximum, frequency and threshold for selective brain cooling in three male and two  
 3 female oryx. Data are mean  $\pm$  s.d. and encompass at least 4400 simultaneous measurements of brain and carotid blood temperature in each  
 4 animal.

| Oryx        | Month | Mean brain<br>temperature(°C) | Mean carotid<br>temperature(°C) | Mean $T_{\text{carotid}} -$<br>$T_{\text{brain}}$ (°C) | Selective brain cooling |             |                  |                   | N<br>(days) |
|-------------|-------|-------------------------------|---------------------------------|--------------------------------------------------------|-------------------------|-------------|------------------|-------------------|-------------|
|             |       |                               |                                 |                                                        | Mean<br>(°C)            | Max<br>(°C) | Frequency<br>(%) | Threshold<br>(°C) |             |
| Oryx 1 ♀    | April | 38.42 $\pm$ 0.31              | 38.63 $\pm$ 0.39                | +0.21 $\pm$ 0.19                                       | 0.29 $\pm$ 0.16         | 0.95        | 90               | 37.9              | 15          |
| Oryx 2 ♀    | April | 38.44 $\pm$ 0.62              | 38.64 $\pm$ 0.74                | +0.20 $\pm$ 0.26                                       | 0.30 $\pm$ 0.19         | 1.10        | 82               | 37.6              | 24          |
| Oryx 3 ♂    | April | 38.53 $\pm$ 0.38              | 38.83 $\pm$ 0.50                | +0.30 $\pm$ 0.20                                       | 0.34 $\pm$ 0.17         | 1.35        | 94               | 37.8              | 22          |
| Oryx 4 ♂    | May   | 38.99 $\pm$ 0.45              | 38.71 $\pm$ 0.60                | -0.28 $\pm$ 0.25                                       | 0.18 $\pm$ 0.14         | 0.93        | 11               | 39.6              | 28          |
|             | June  | 38.87 $\pm$ 0.88              | 38.86 $\pm$ 1.11                | -0.03 $\pm$ 0.32                                       | 0.32 $\pm$ 0.19         | 1.03        | 38               | 39.0              | 29          |
| Taif oryx ♂ | April | 38.41 $\pm$ 0.45              | 38.66 $\pm$ 0.60                | +0.24 $\pm$ 0.26                                       | 0.35 $\pm$ 0.20         | 1.19        | 81               | 37.9              | 27          |

5 N = number of days of data



1 Table 3. Akaike’s Information Criterion (AIC) for the five best-fit mixed effects linear models  
 2 incorporating the main factors which accounted for the variability in average 24-hour selective  
 3 brain cooling. “Individual” and “Julian day” were included as random factors.  $d$  = number of  
 4 parameters including random factors,  $\Delta_{AIC}$  = difference between AIC with the best model.

| Formula (fixed effects)                                                                     | $d$ | $AIC$   | $\Delta_{AIC}$ |
|---------------------------------------------------------------------------------------------|-----|---------|----------------|
| Water availability + water vapour pressure<br>+ carotid blood temperature                   | 5   | -364    | 0.00           |
| Water availability + water vapour pressure<br>+ carotid blood temperature + air temperature | 6   | -356.66 | 7.62           |
| Water availability + carotid blood temperature                                              | 4   | -351.34 | 12.95          |
| Water availability + carotid blood temperature + air temperature                            | 5   | -349.22 | 15.07          |
| Water availability + water vapour pressure                                                  | 4   | -296.8  | 67.49          |

5
